# THE AMERICAN JOURNAL OF PSYCHIATRY

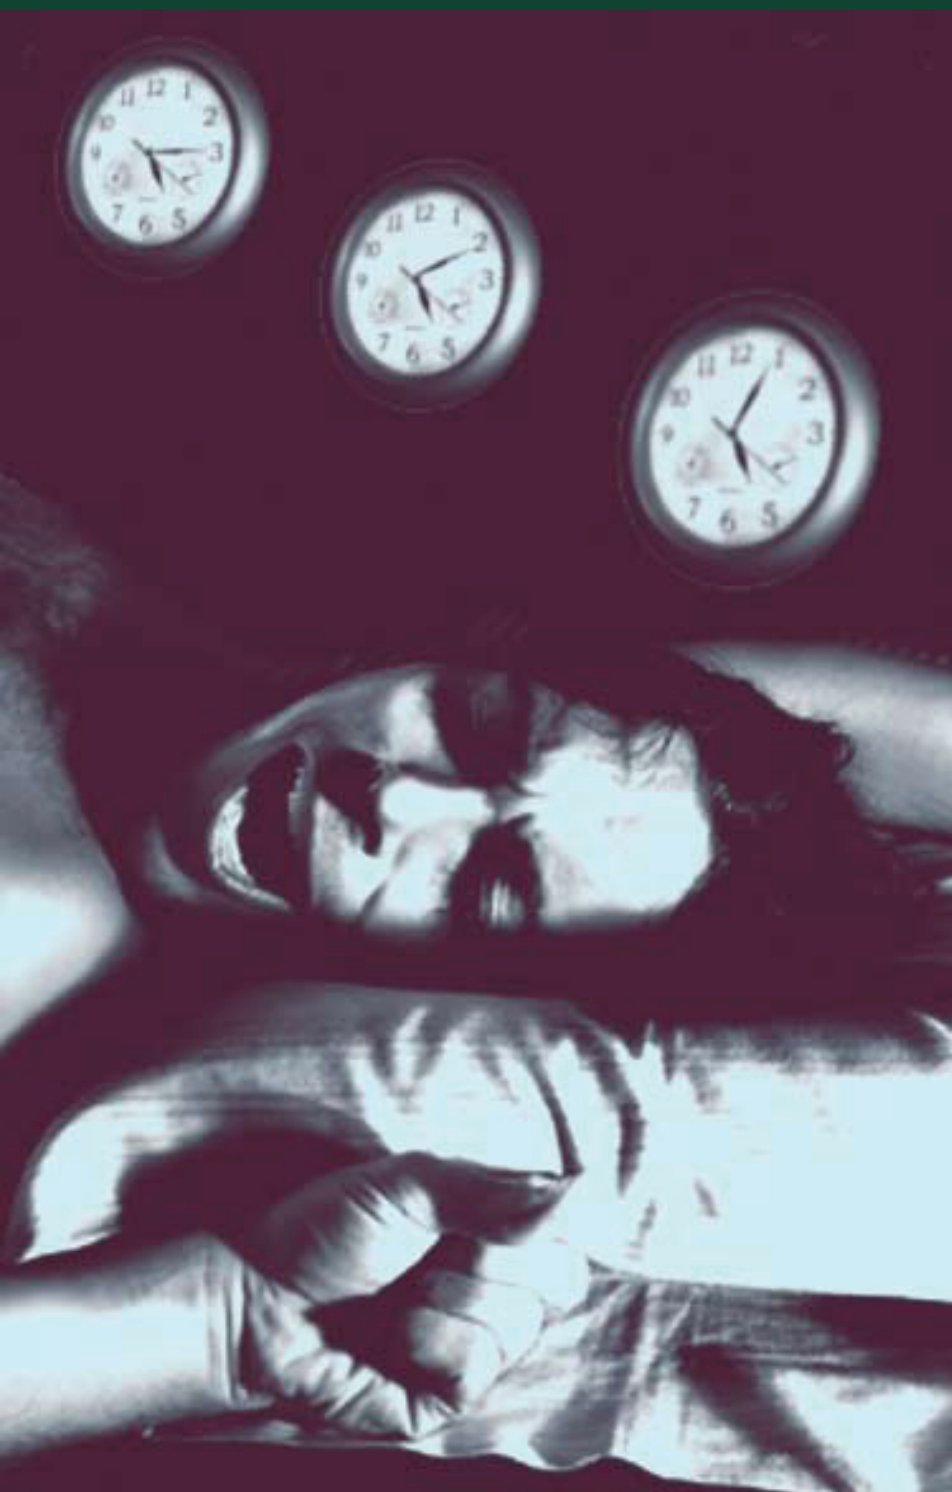

## Postoperative Delirium

Gregory L. Fricchione, M.D., et al. 803

## ◀ Sleep and Circadian Rhythms in Bipolar Disorder: Seeking Synchrony, Harmony and Regulation

Allison G. Harvey, M.D. 820

## ◀ Sleep Disturbance in Bipolar Disorder: Therapeutic Implications

David T. Plante, M.D.,  
and John W. Winkelman, M.D. 830

## Clinical Symptom Responses to Atypical Antipsychotic Medications in Alzheimer's Disease: Phase 1 Outcomes From the CATIE-AD Effectiveness Trial

David L. Sultzer, M.D., et al. 844

Continuing Medical Education 927

July 2008

Volume 165 • Number 7

Official Journal of the  
AMERICAN PSYCHIATRIC ASSOCIATION

[ajp.psychiatryonline.org](http://ajp.psychiatryonline.org)
